# Supplementary material
Source: Springer Nature journal article supplement (https://www.springermedizin.de/resource/supplementary/12958_2011_895_MOESM5_ESM.pdf/9568740)

A

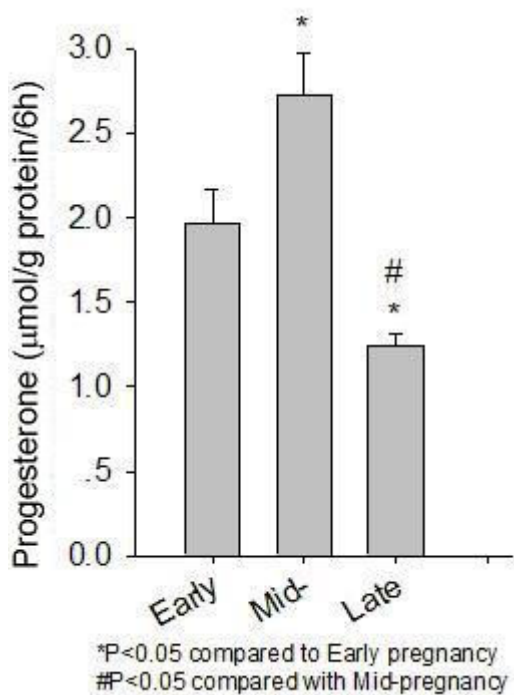

B

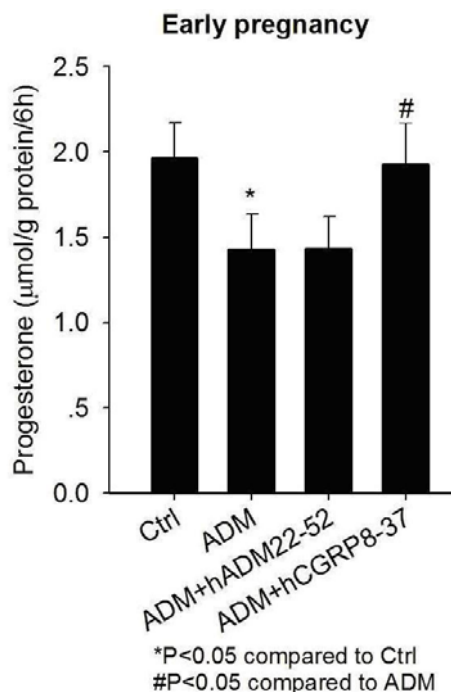

C

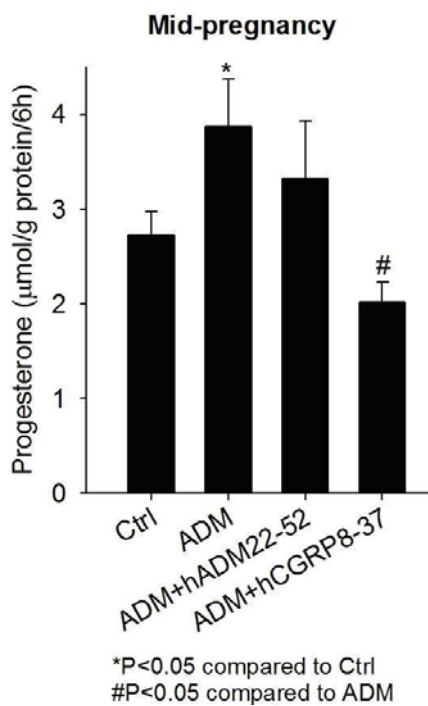

D

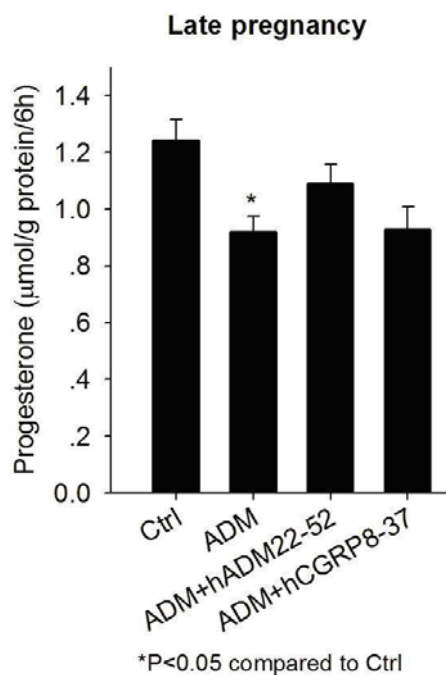

Supplement: MOESM5 [file 9568740]
